# Supplementary material for: Identification and validation of autophagy-related prognostic signature for head and neck squamous cell carcinoma
Source: PubMed Central journal article supplement — Transl Oncol. 2021 Apr 18;14(7):101094. doi: 10.1016/j.tranon.2021.101094 (PMC8080081; doi:10.1016/j.tranon.2021.101094), 2021-04-18
Supplement: mmc1.pdf [file mmc1.pdf]

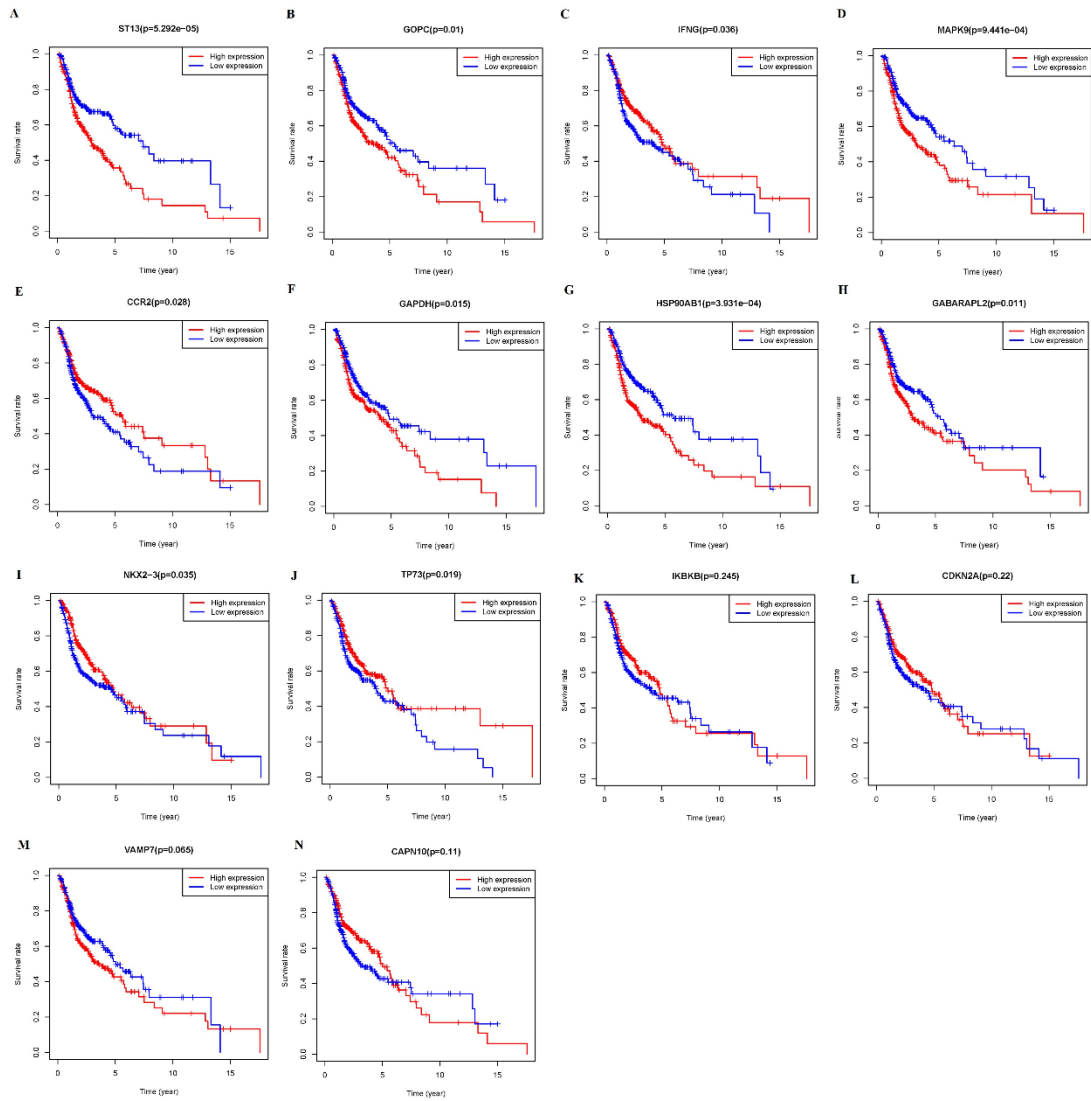

Supplementary Figure 1. The correlation between ARGs included in OS-related prognostic signature and patients' survival.
