# Supplementary material for: Identification and validation of autophagy-related prognostic signature for head and neck squamous cell carcinoma
Source: PubMed Central journal article supplement — Transl Oncol. 2021 Apr 18;14(7):101094. doi: 10.1016/j.tranon.2021.101094 (PMC8080081; doi:10.1016/j.tranon.2021.101094), 2021-04-18
Supplement: mmc2.pdf [file mmc2.pdf]

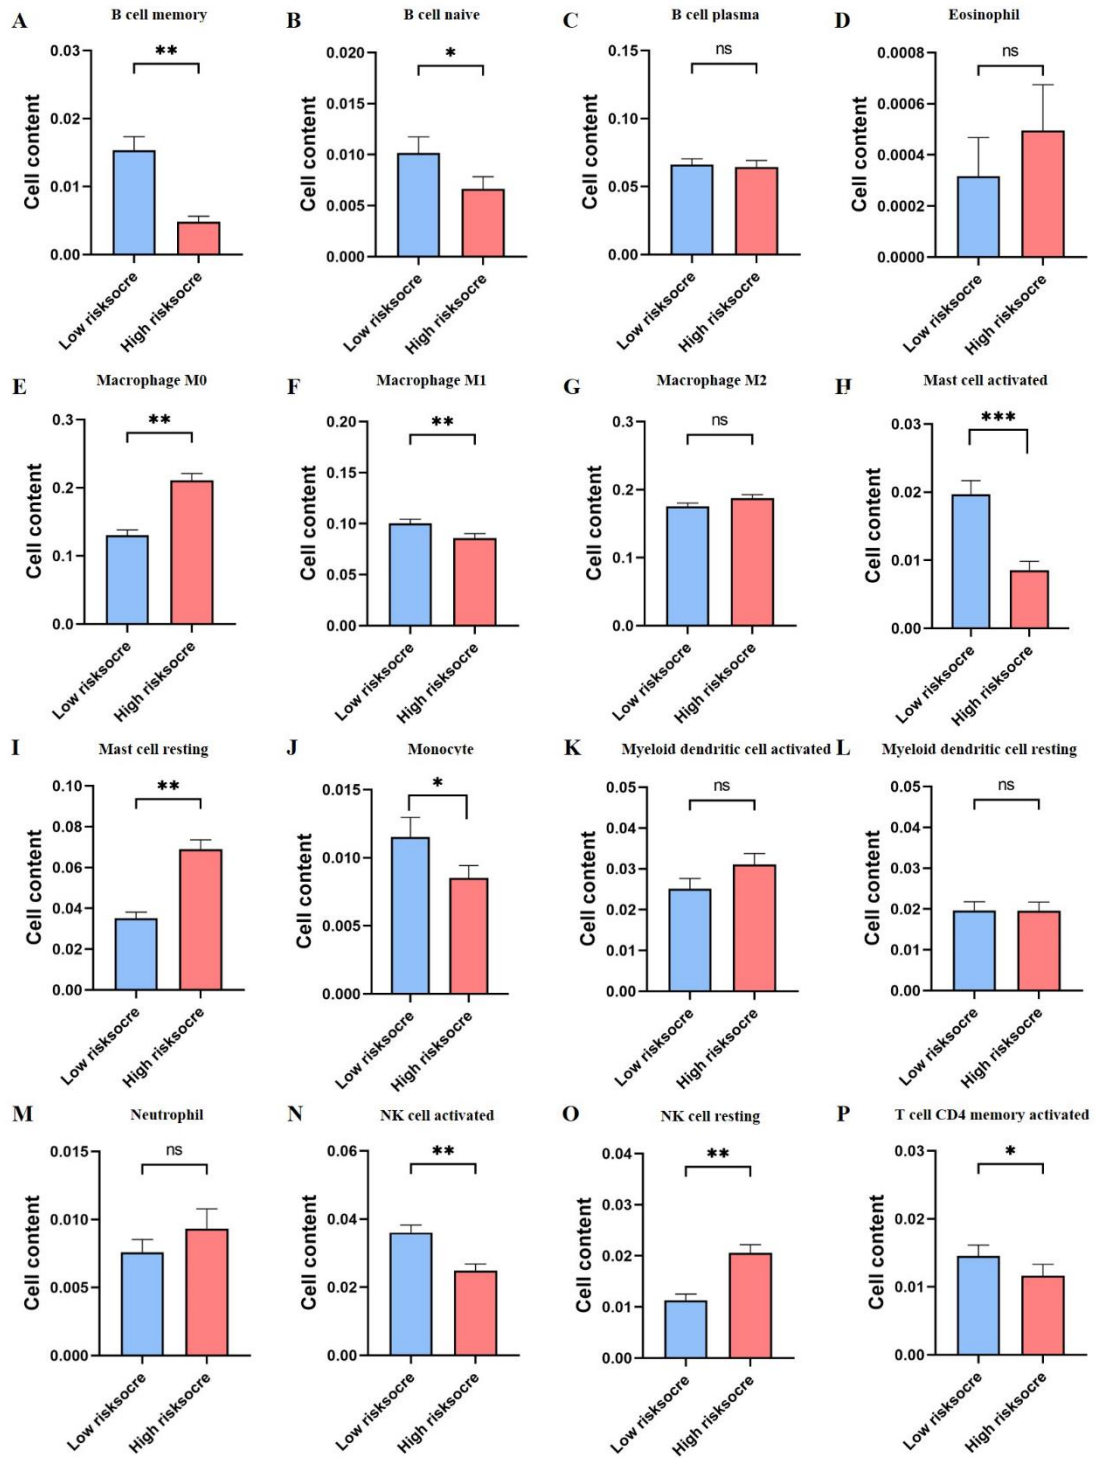

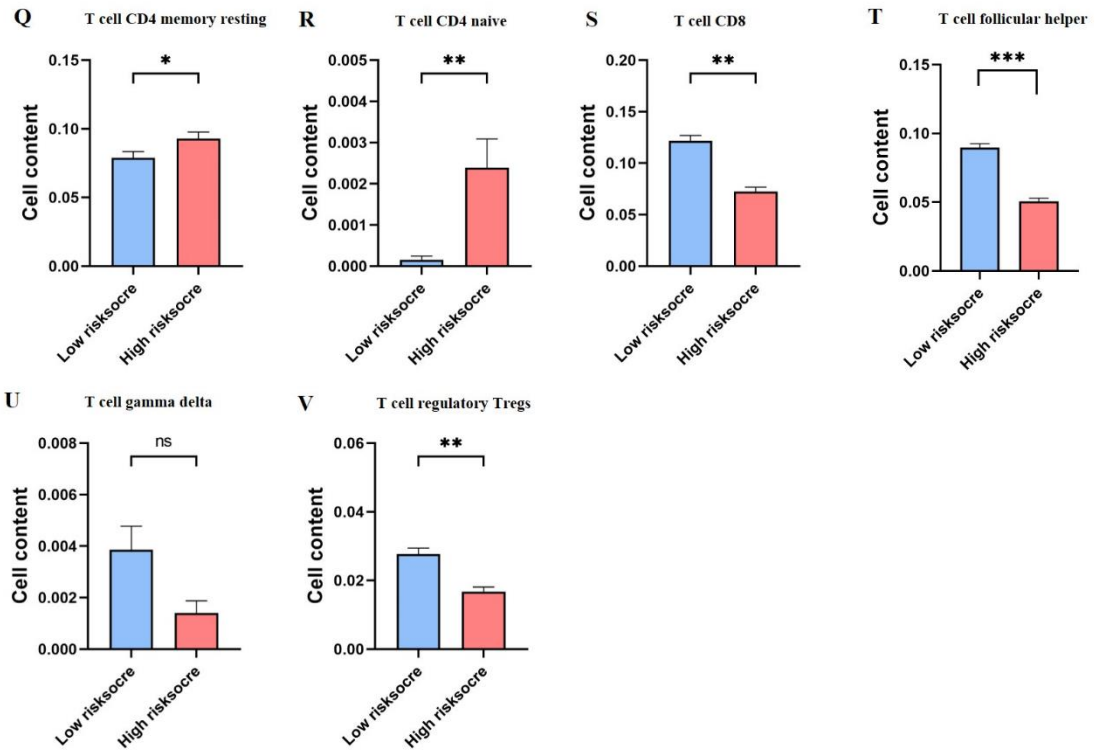

Supplementary Figure 2. The Landscape of Immune Cell Infiltration in HNSCC. ns: no significance, \*p < 0.05 and \*\*p < 0.01.
