# Supplementary material for: Identification and validation of autophagy-related prognostic signature for head and neck squamous cell carcinoma
Source: PubMed Central journal article supplement — Transl Oncol. 2021 Apr 18;14(7):101094. doi: 10.1016/j.tranon.2021.101094 (PMC8080081; doi:10.1016/j.tranon.2021.101094), 2021-04-18
Supplement: mmc3.pdf [file mmc3.pdf]

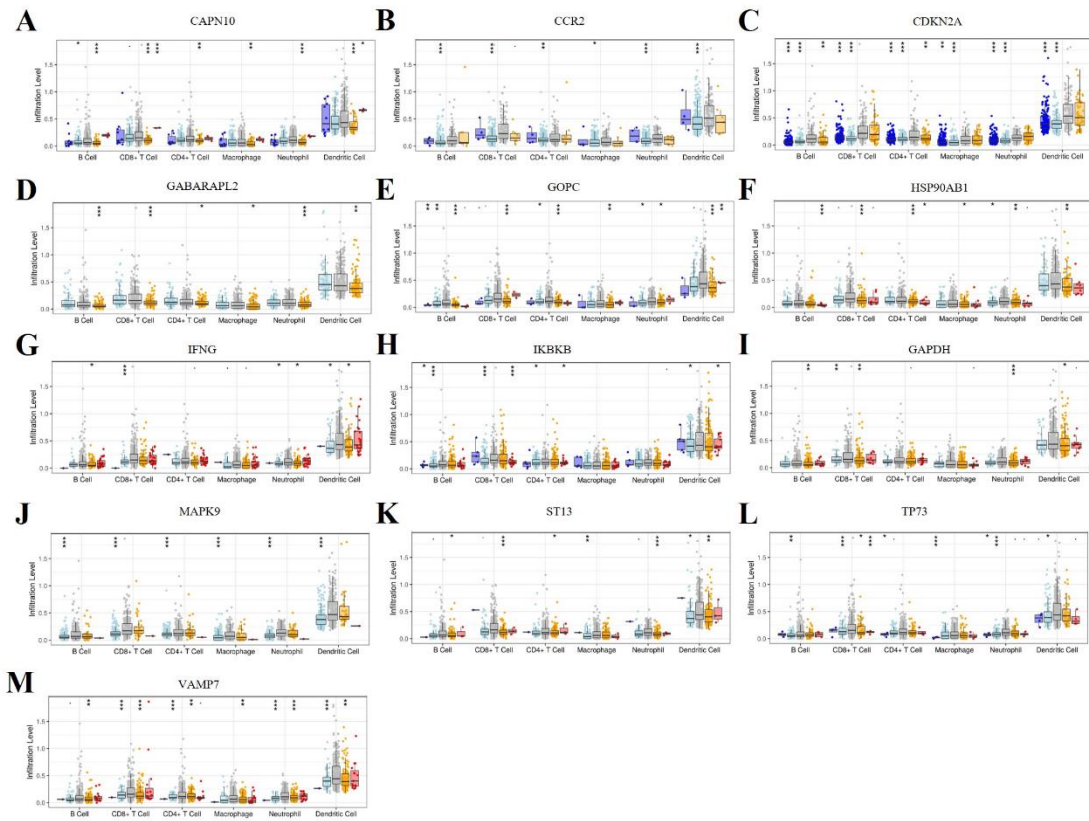

Copy Number    Deep Deletion    Arm-level Deletion    Diploid/Normal    Arm-level Gain    High Amplification

Supplementary Figure 3. Effect of the genetic alterations of risk-related genes on the immune cell infiltration. \* $p < 0.05$ , \*\* $p < 0.01$ , and \*\*\* $p < 0.001$
