# Supplementary material for: Identification and validation of autophagy-related prognostic signature for head and neck squamous cell carcinoma
Source: PubMed Central journal article supplement — Transl Oncol. 2021 Apr 18;14(7):101094. doi: 10.1016/j.tranon.2021.101094 (PMC8080081; doi:10.1016/j.tranon.2021.101094), 2021-04-18
Supplement: mmc5.pdf [file mmc5.pdf]

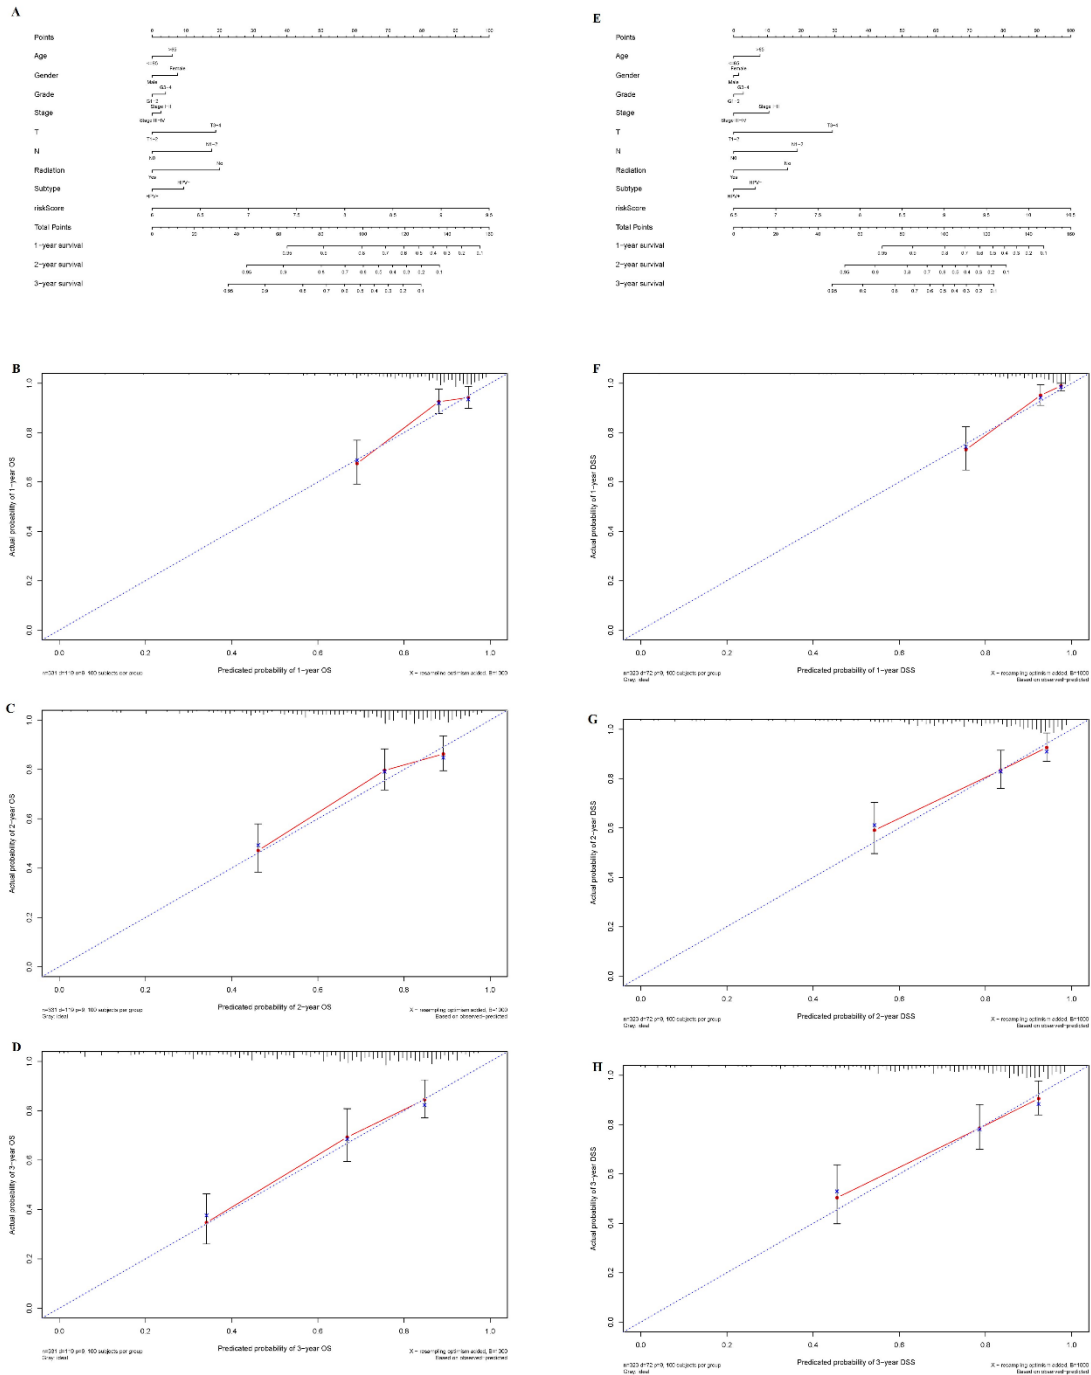

Supplementary Figure 5. Construction a robust nomogram prediction model using the risk signature and other clinicopathological parameters. (A) A nomogram of the HNSCC cohort used to predict the OS. Calibration maps used to predict the 1-year OS (B), 2-year OS (C) and 3-year OS (D), respectively. (E) A nomogram of the HNSCC cohort used to predict the DSS. Calibration plots for the 1-year DSS (F), 2-year DSS (G) and 3-year DSS (H) in the HNSCC cohort.
